# Supplementary material for: Brain-derived and in vitro-seeded alpha-synuclein fibrils exhibit distinct biophysical profiles
Source: eLife journal article supplement (doi:10.7554/elife.92775), 2024-03-21

Figure 3 - Figure supplement 1 - A

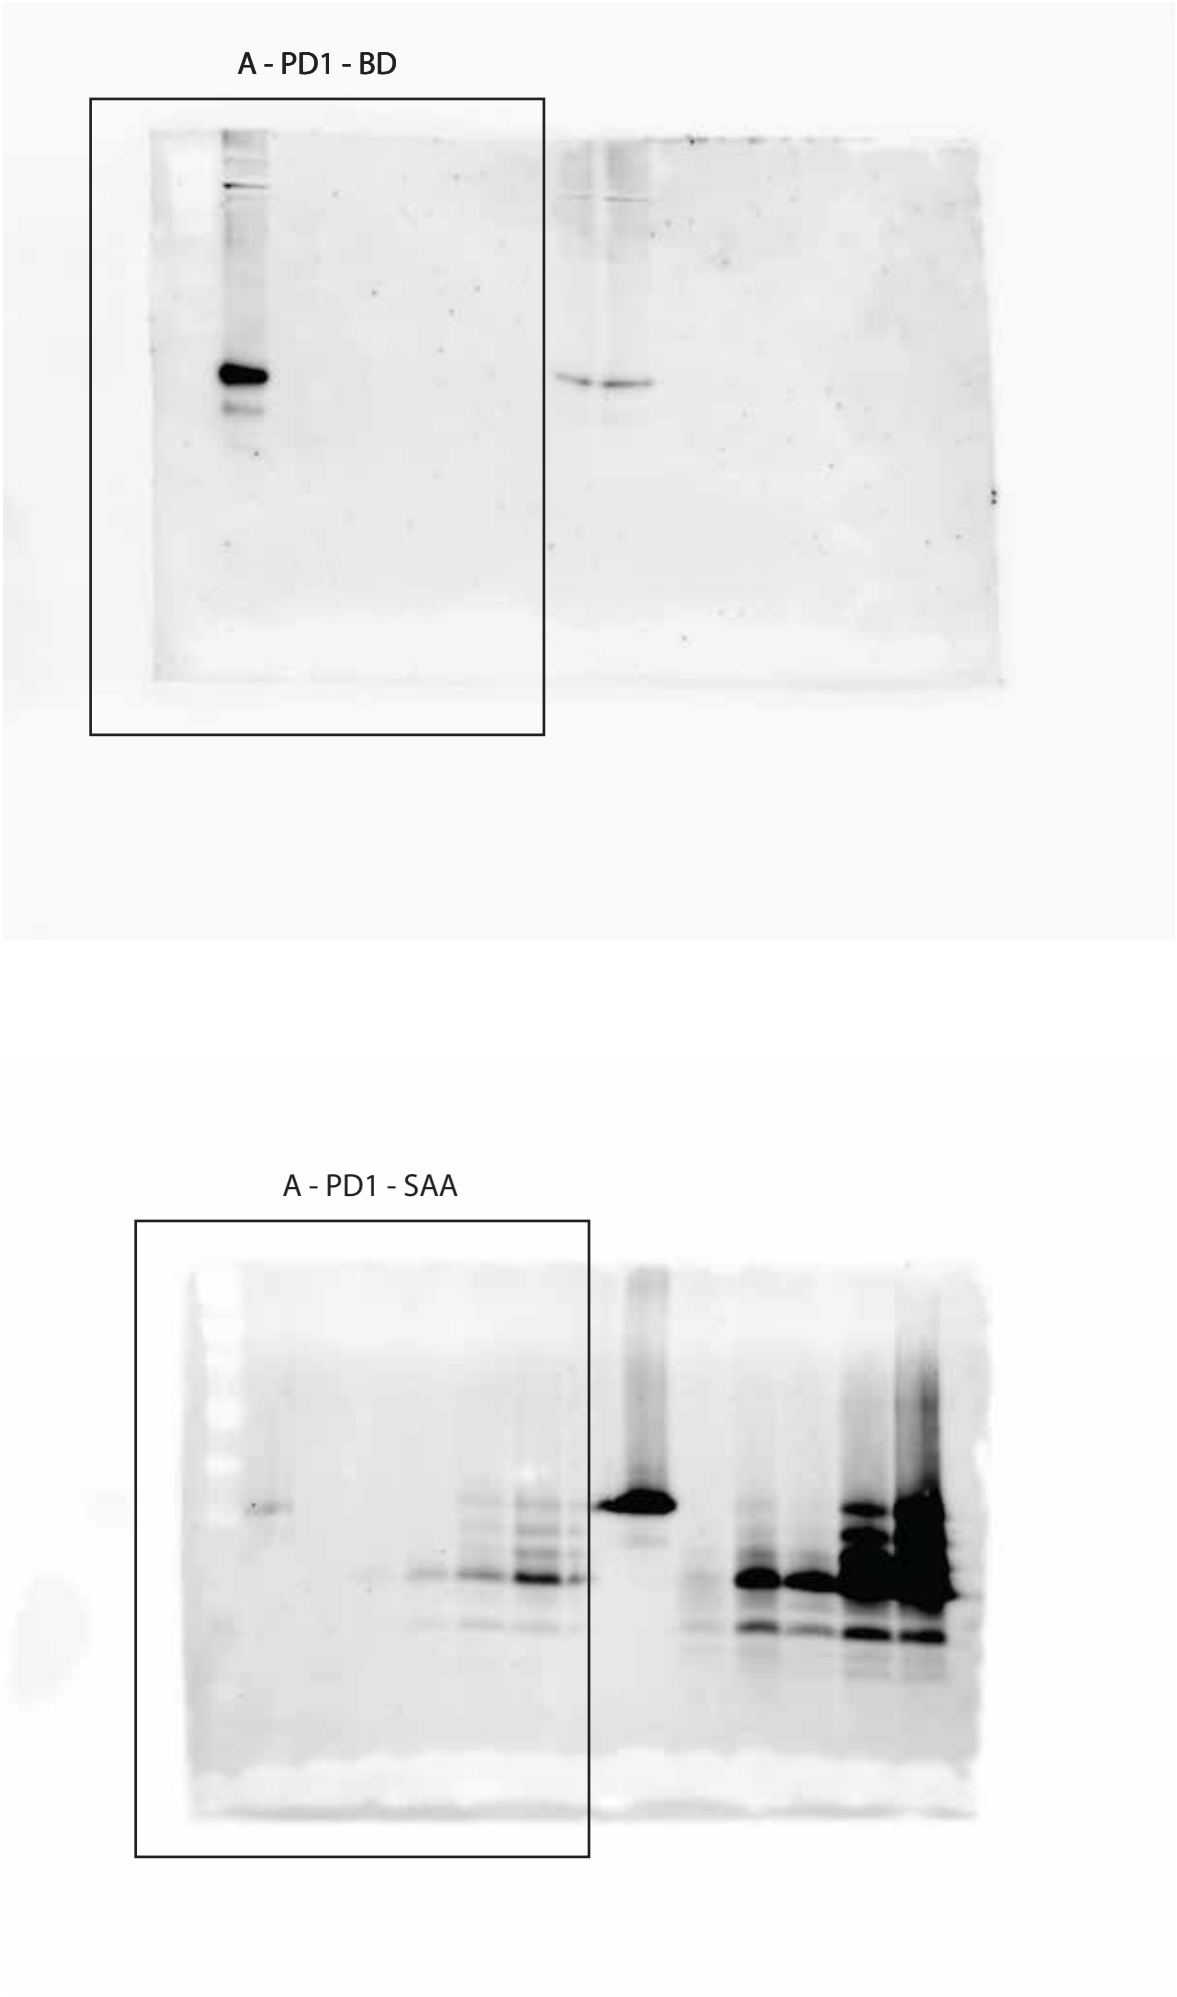

A - PD2 - BD

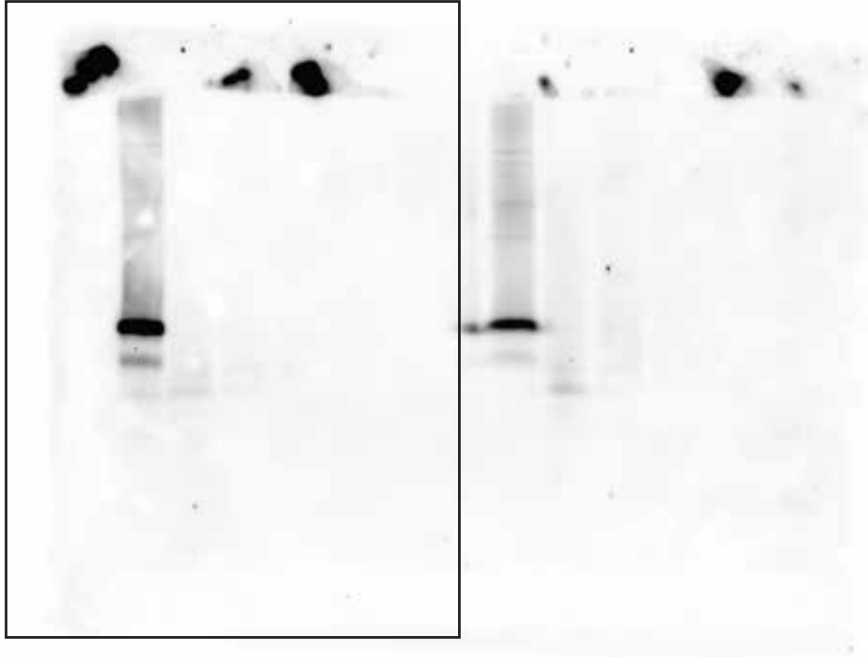

A - PD2 - SAA

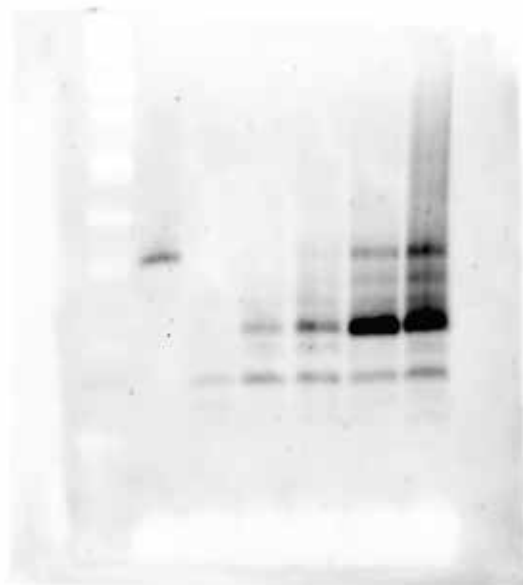

A - PD3 - BD

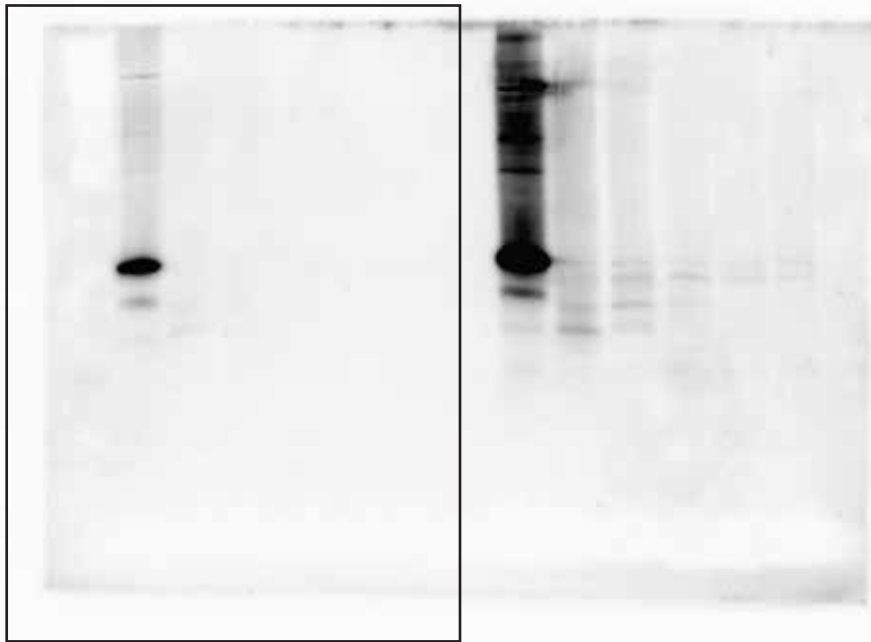

A - PD3 - SAA

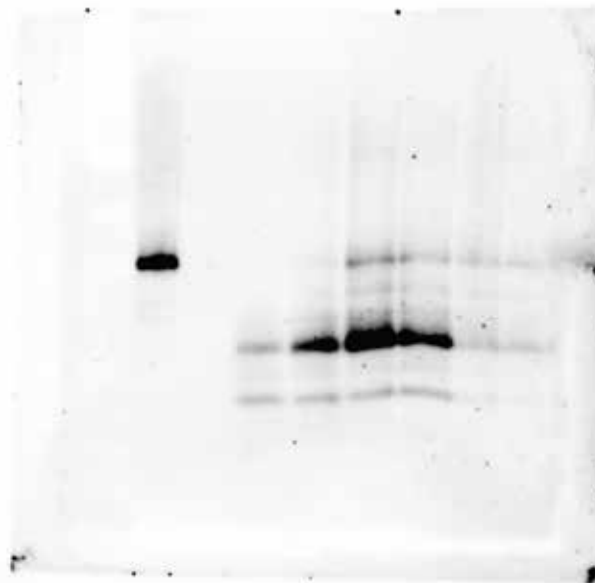

Figure 3 - Figure supplement 1 - B

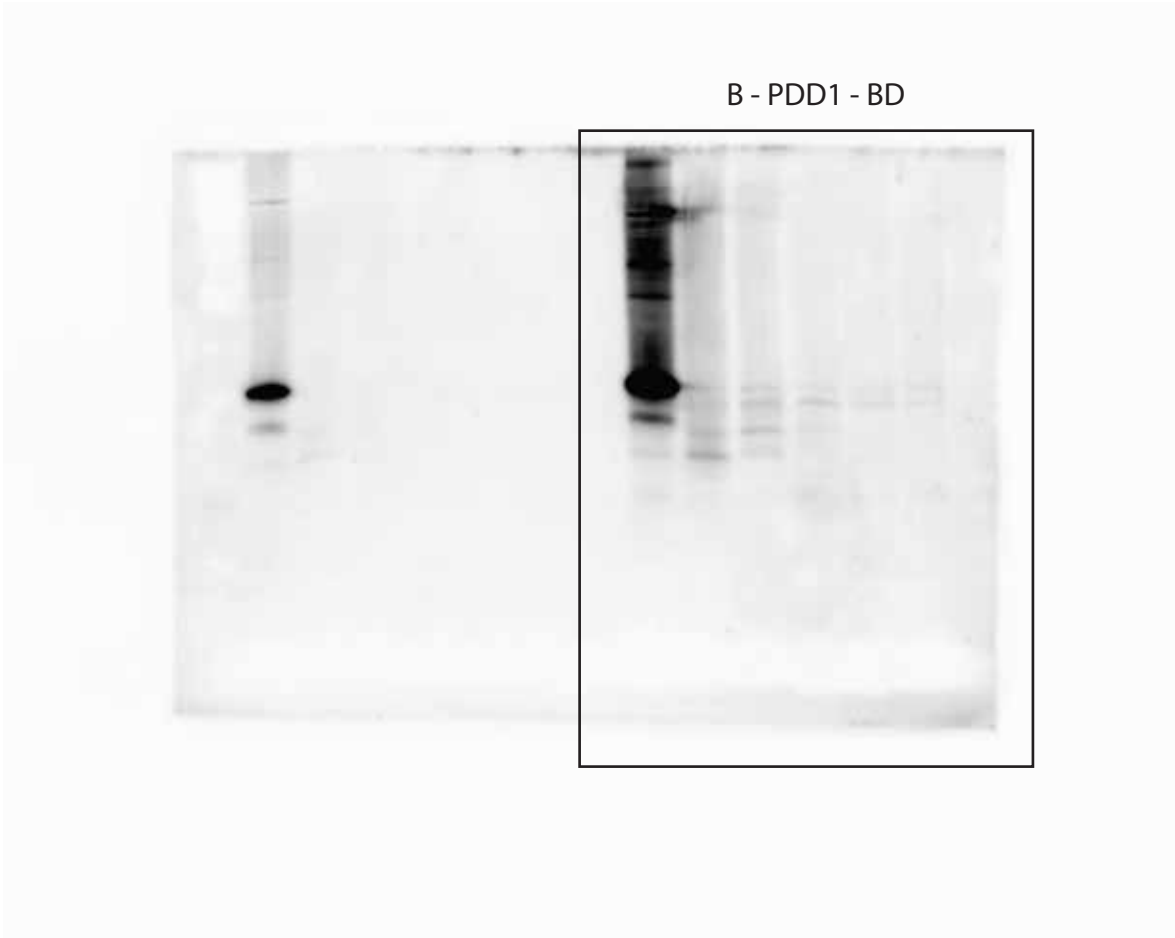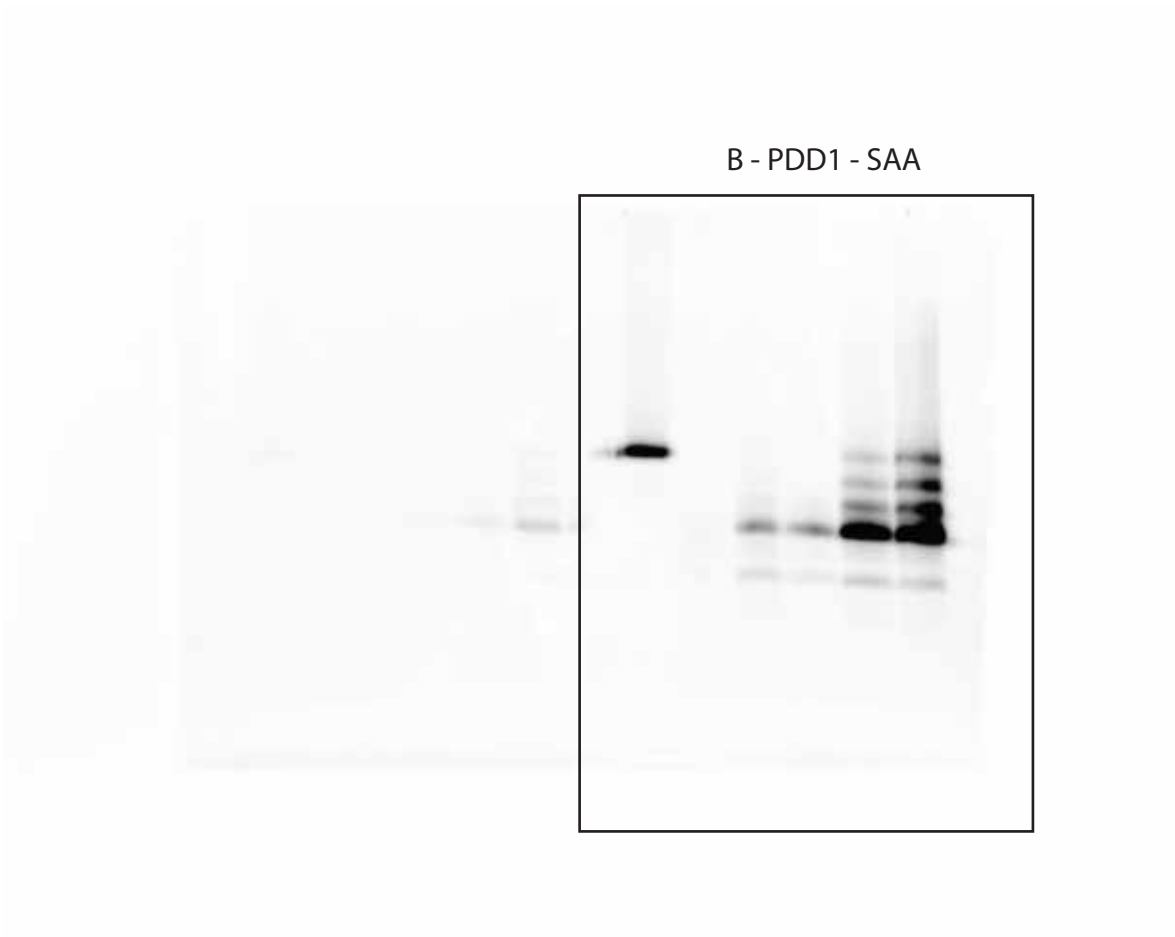

B - PDD2 - BD

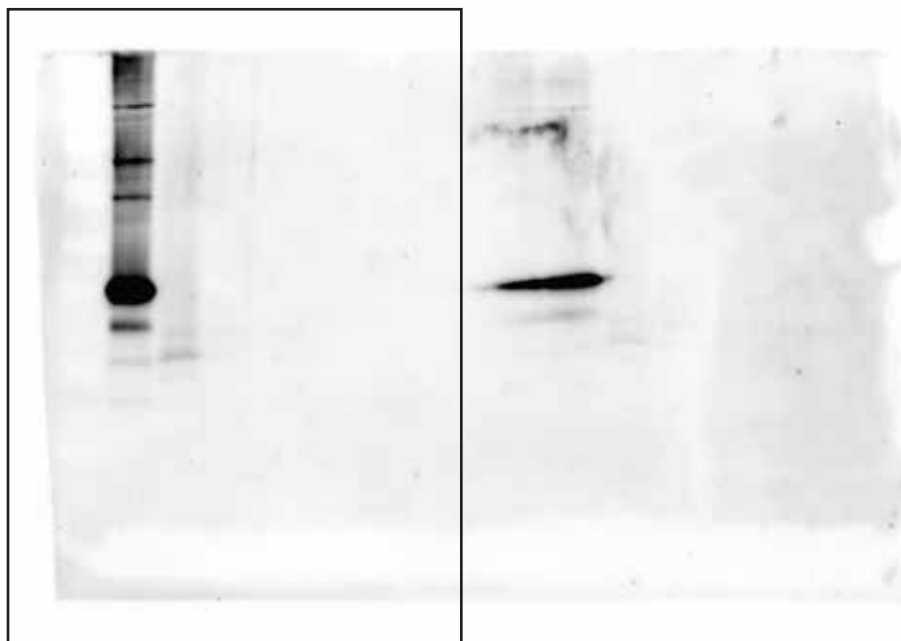

B - PDD2 - SAA

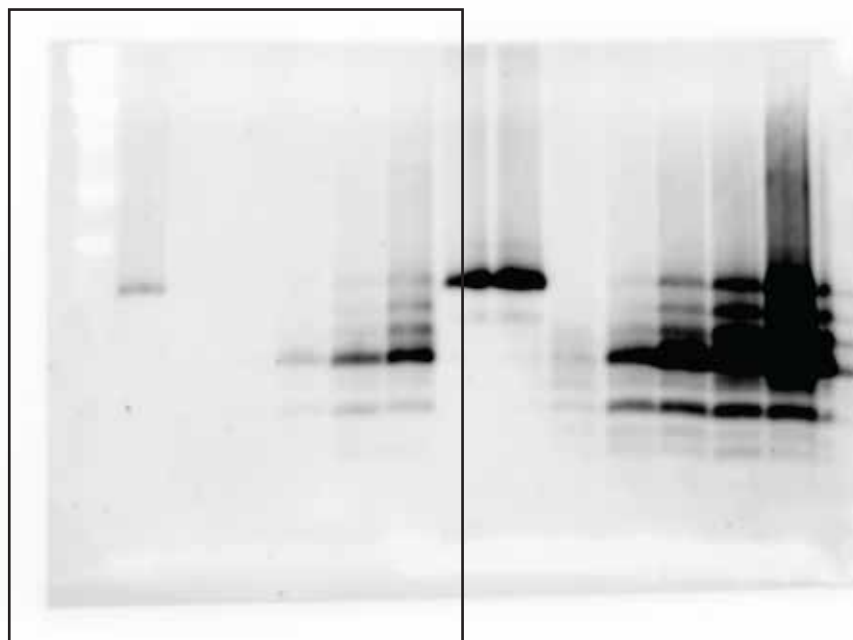

B - PDD3 - BD

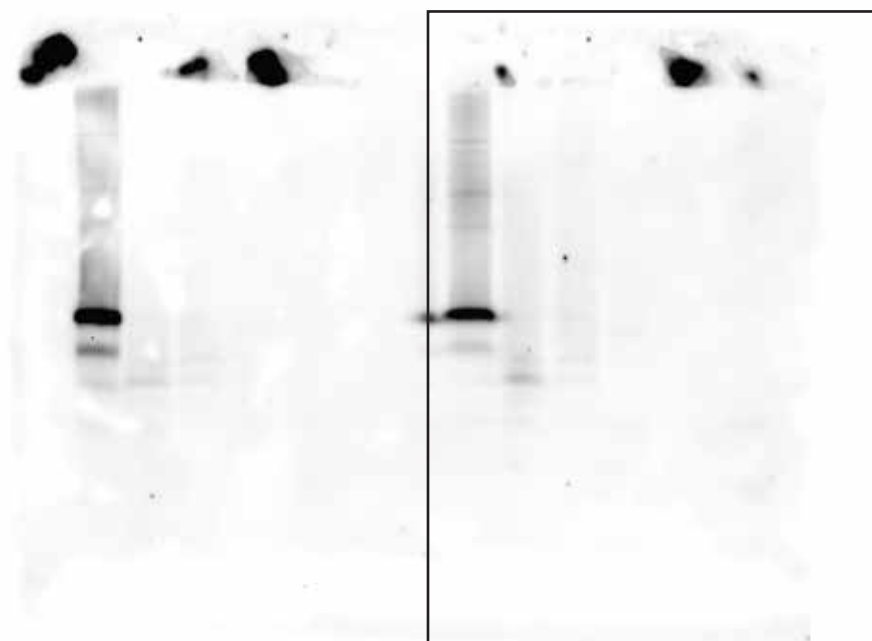

B - PDD3 - SAA

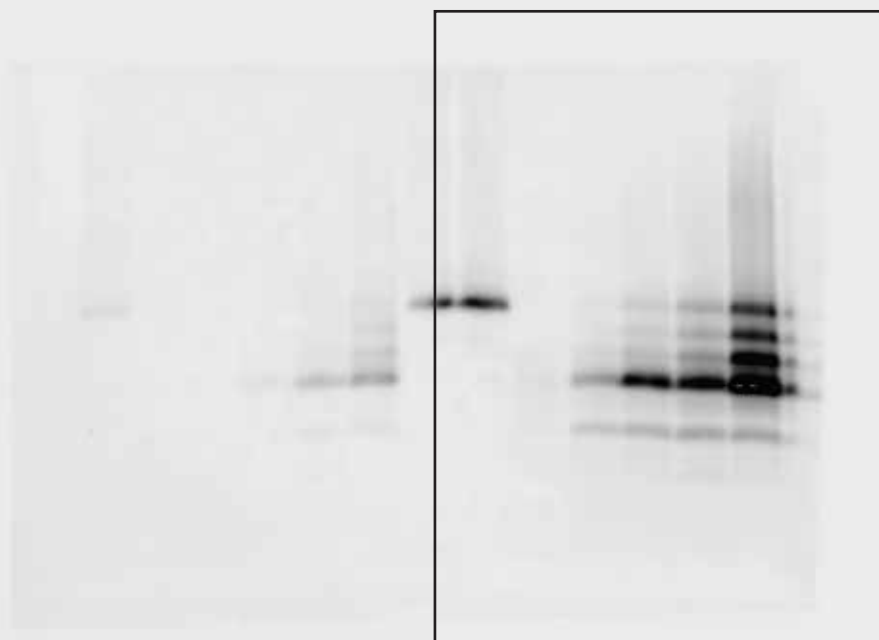

Figure 3 - Figure supplement 1 - C

C - DLB1 - BD

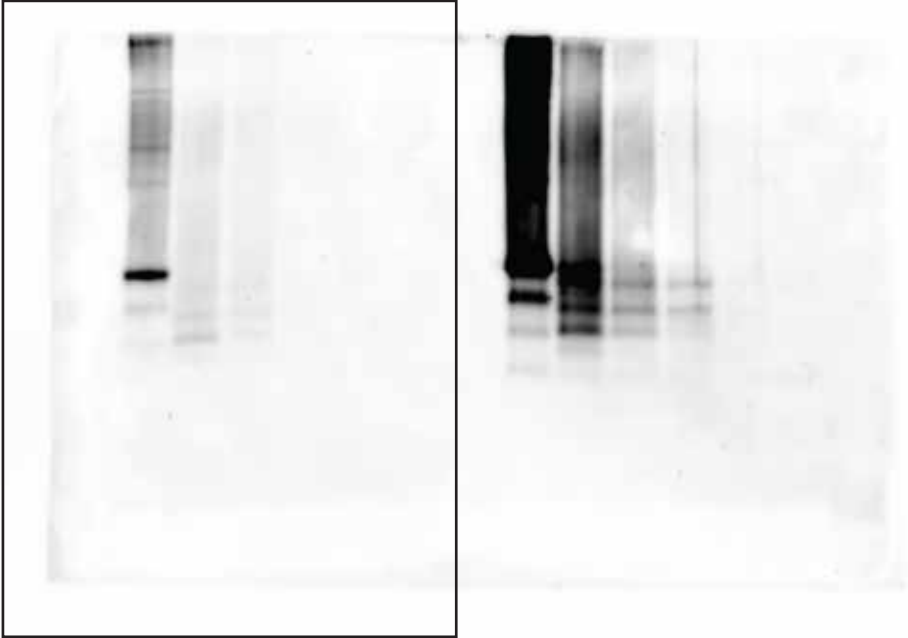

C - DLB1 - SAA

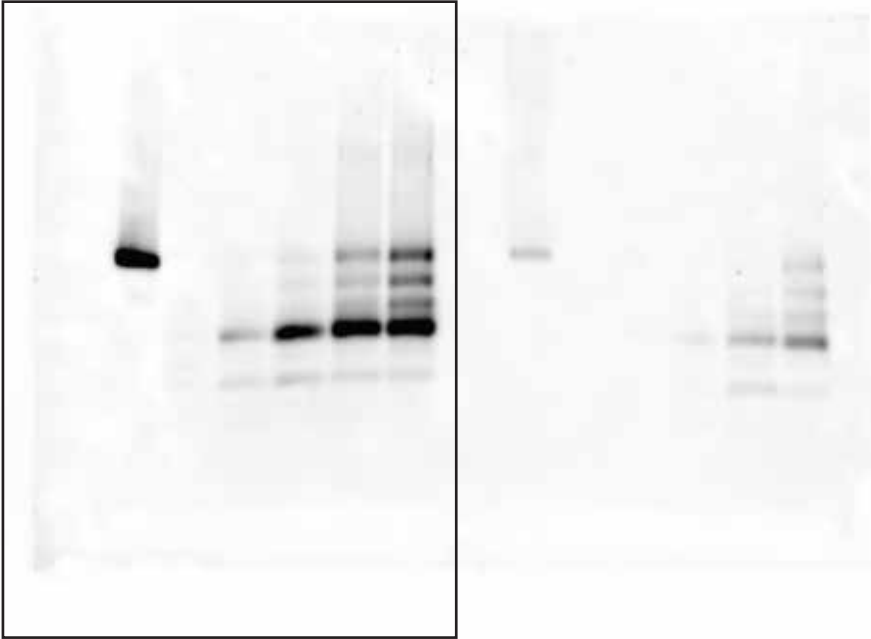

C - DLB2 - BD

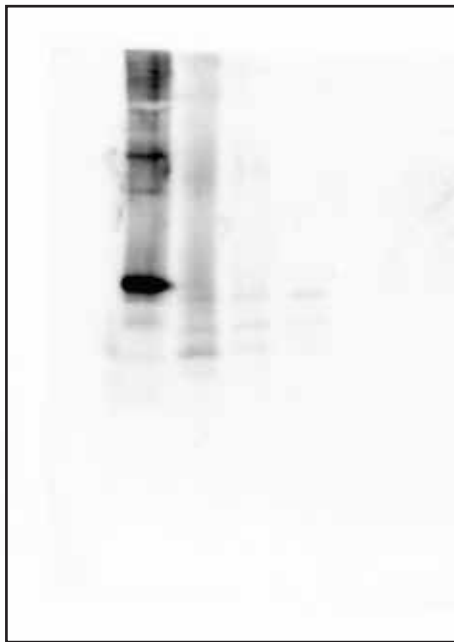

C - DLB2 - SAA

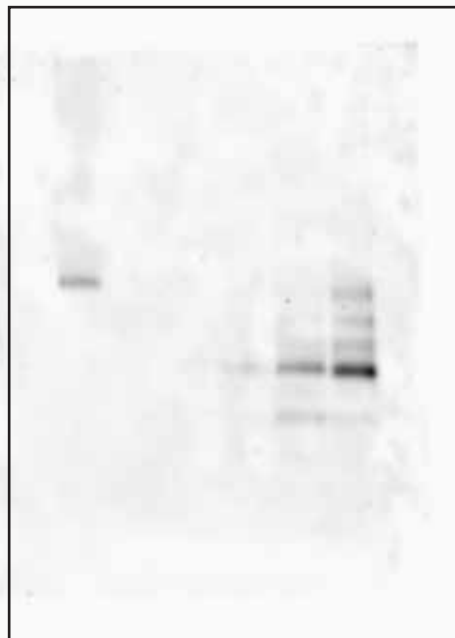



C - DLB3 - BD

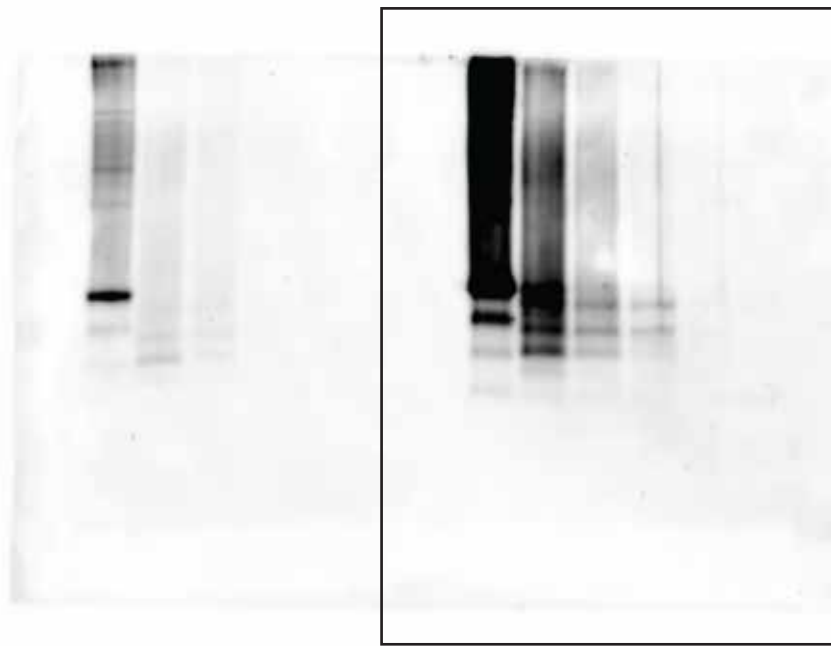

C - DLB3 - SAA

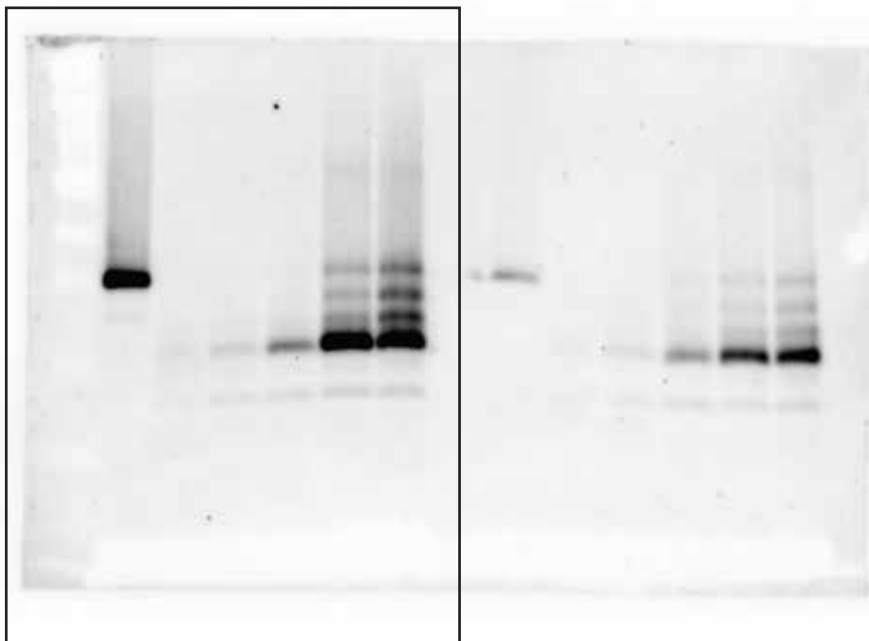

Figure 3 - Figure supplement 1 - D

D - MSA1 - BD

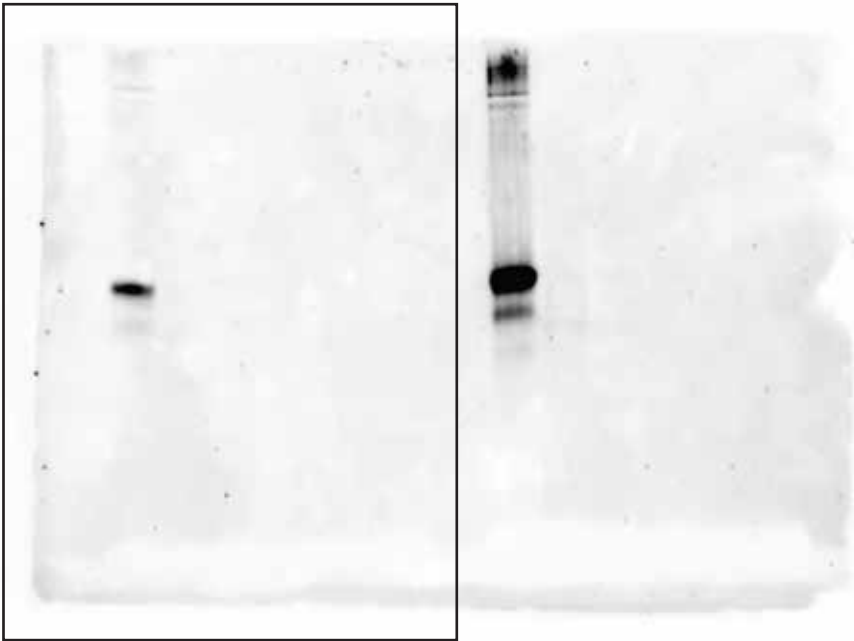

D - MSA1 - SAA

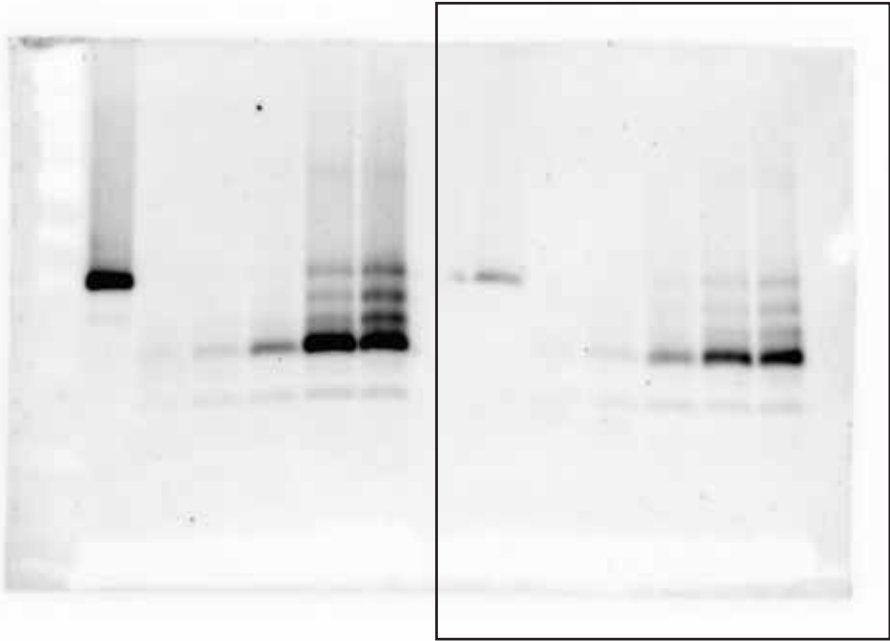

D - MSA2 - BD

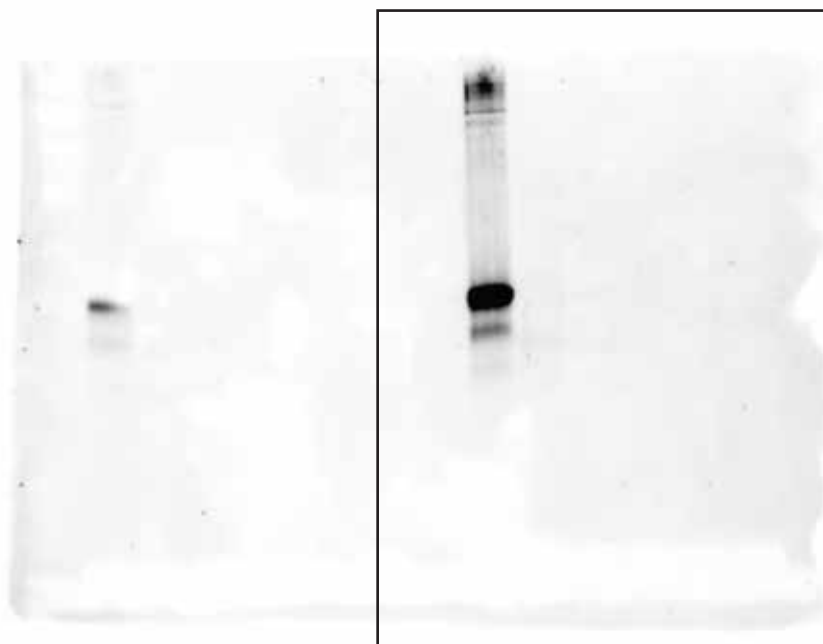

D - MSA2 - SAA

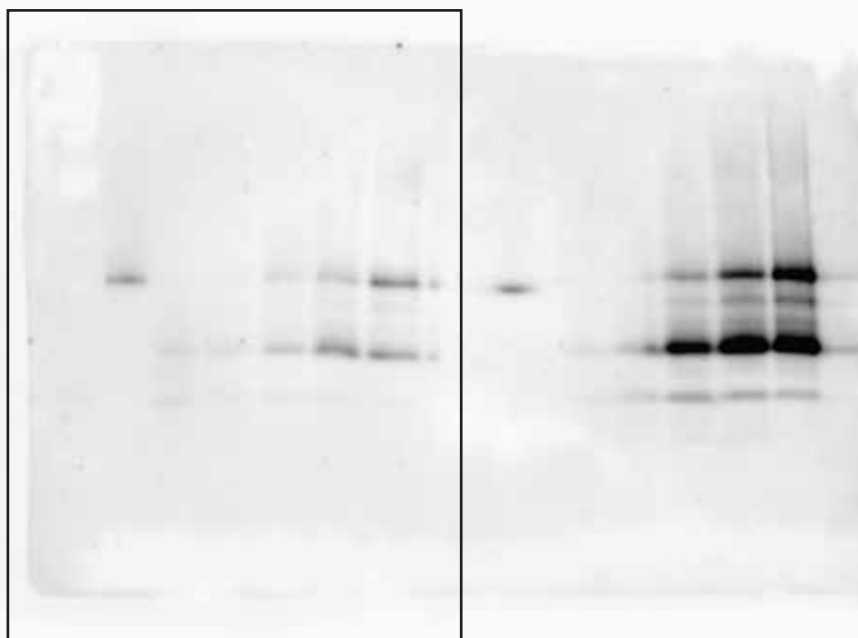

D - MSA3 - BD

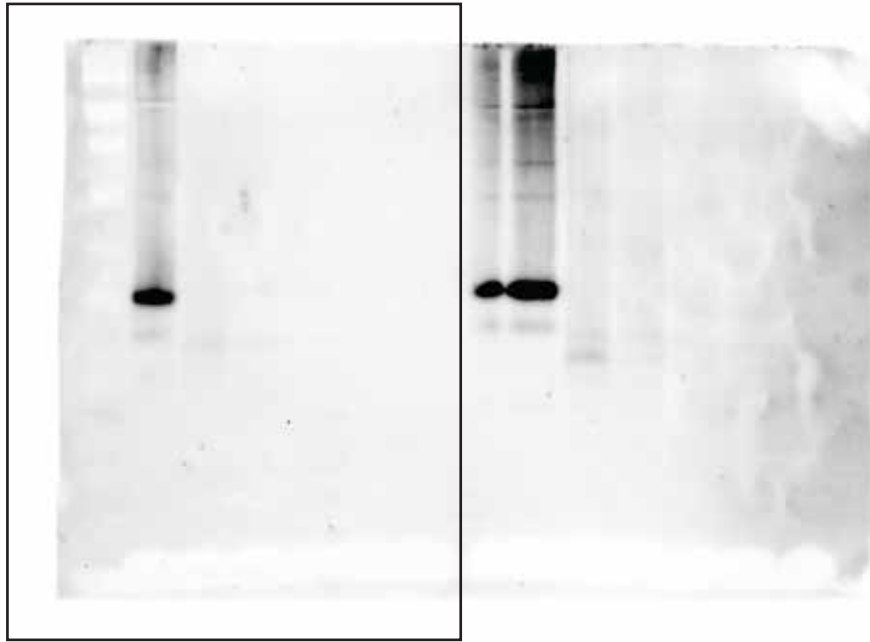

D - MSA3 - SAA

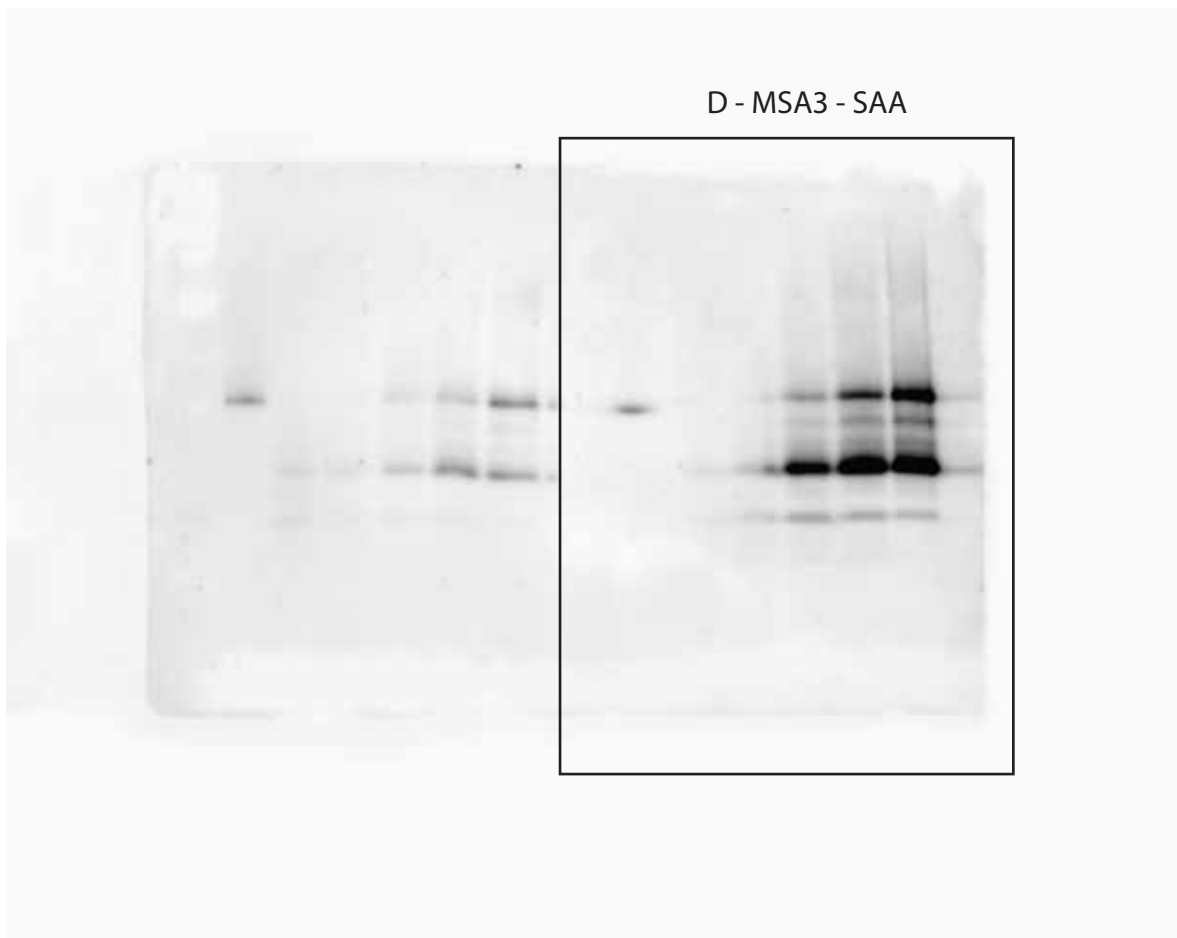

Supplement: fig3-figsupp1-data2 [file elife-92775-fig3-figsupp1-data2-v1.zip]
