# Supplementary material for: Brain-derived and in vitro-seeded alpha-synuclein fibrils exhibit distinct biophysical profiles
Source: eLife journal article supplement (doi:10.7554/elife.92775), 2024-03-21

PD - Brain-derived

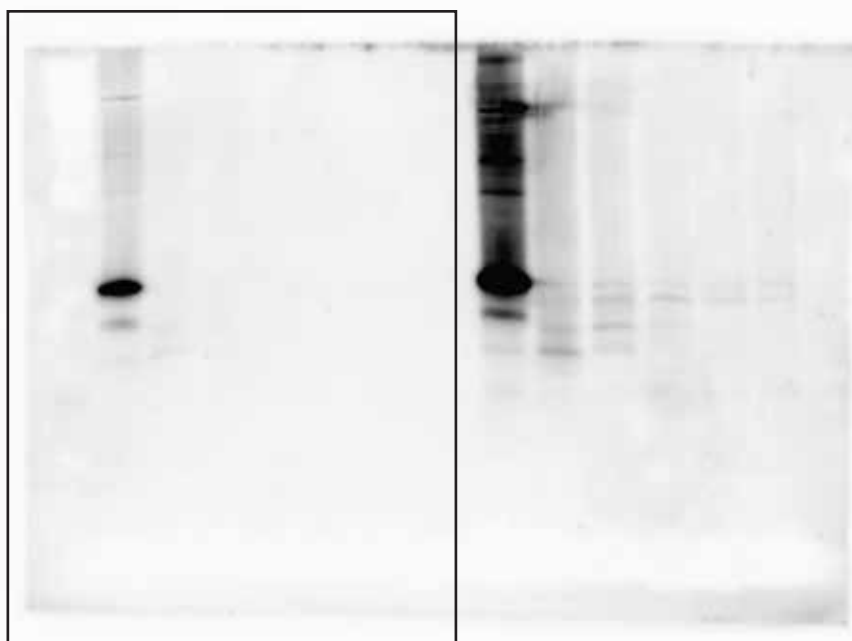

PDD - Brain-derived

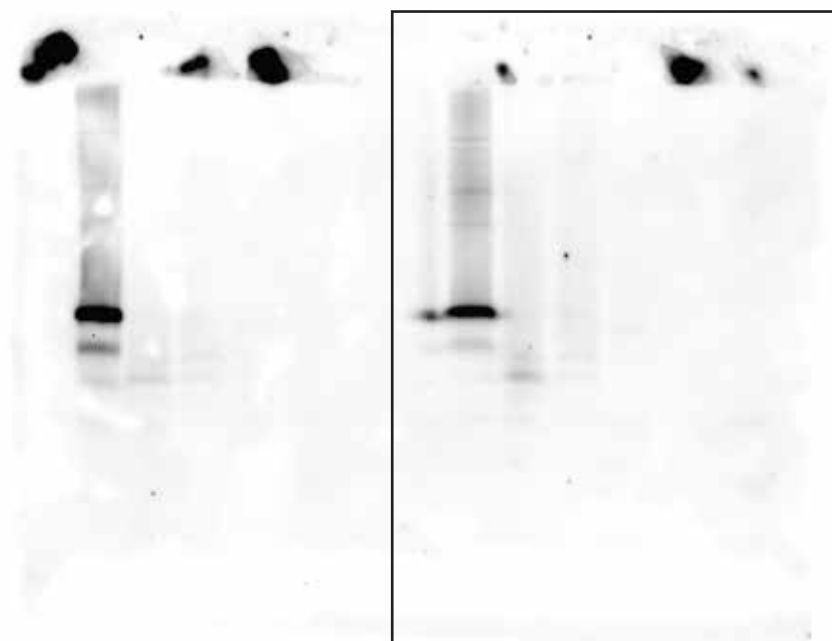

DLB - Brain-derived

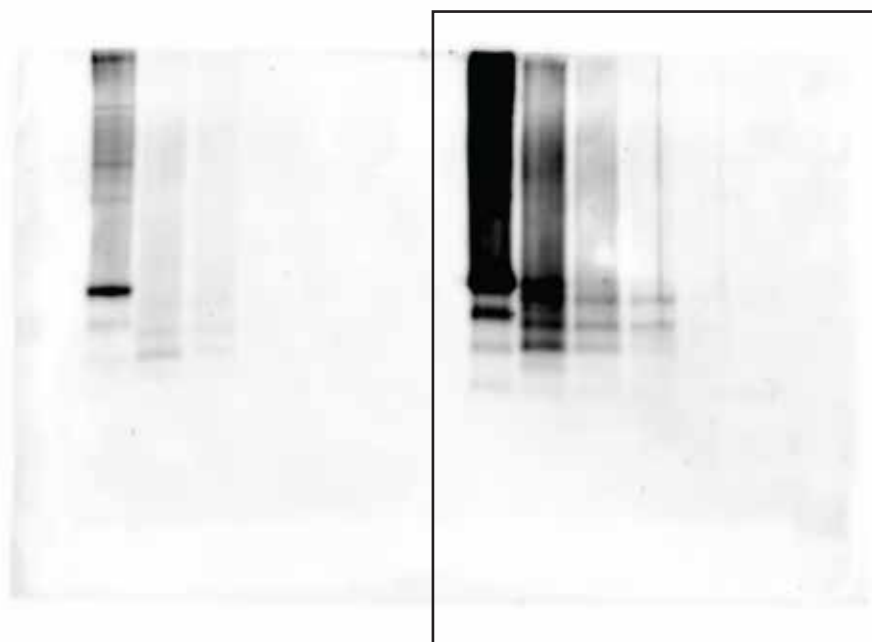

MSA - Brain-derived

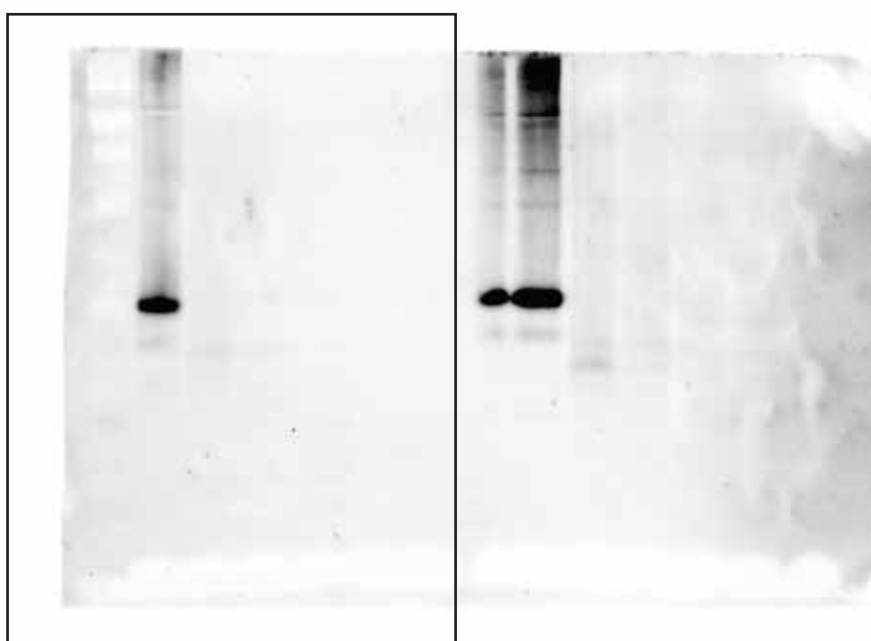

PD - SAA

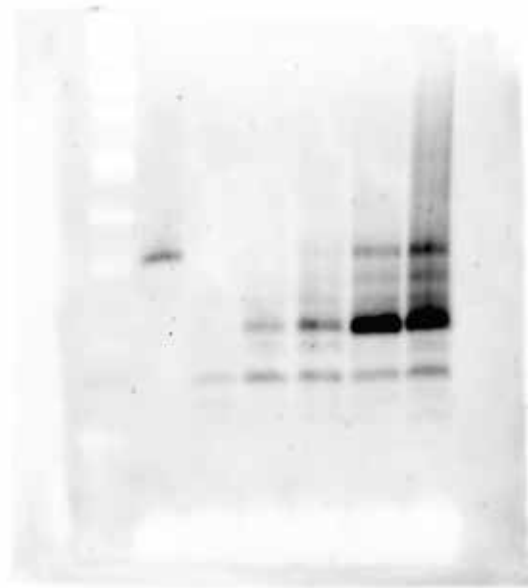

PDD - SAA

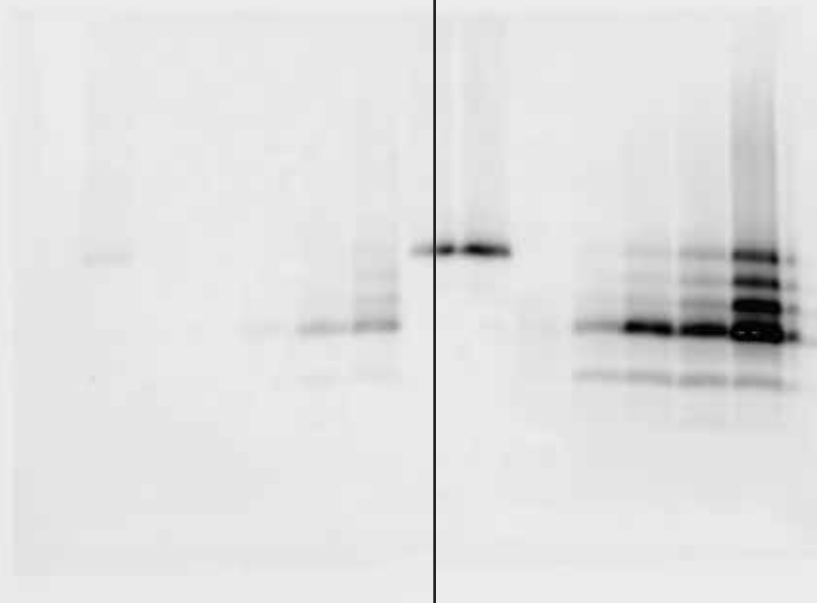

DLB - SAA

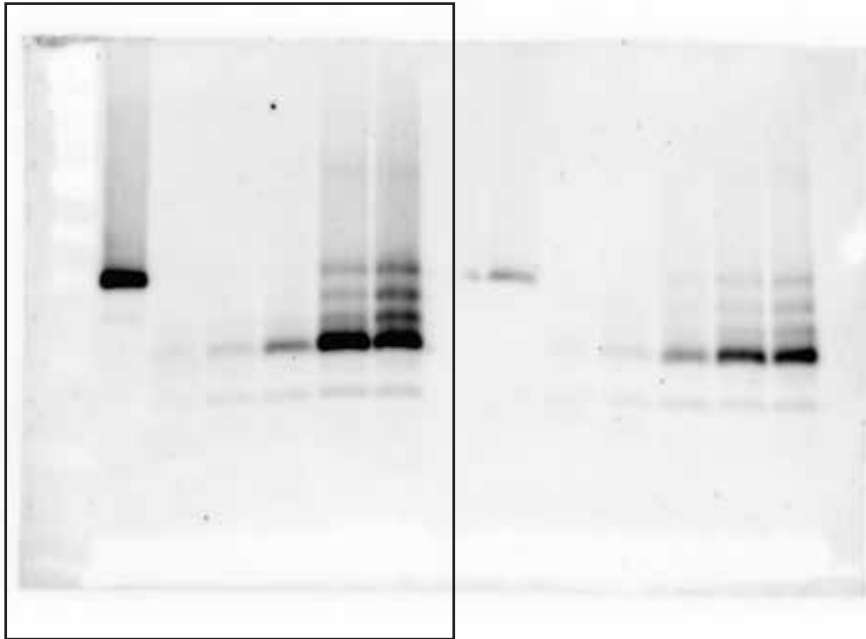

MSA- SAA

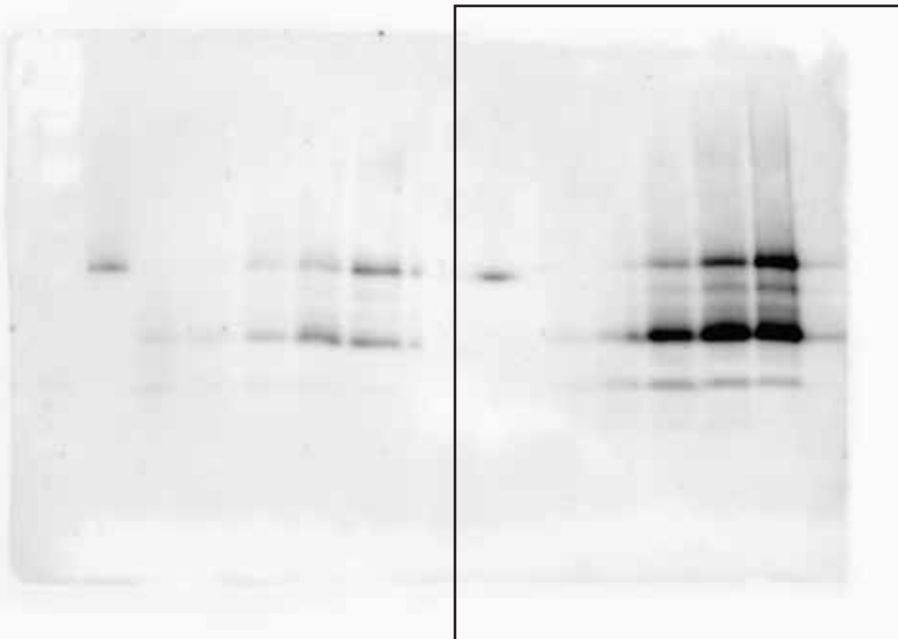

Supplement: fig3-data2 [file elife-92775-fig3-data2-v1.zip]
