# Supplementary material for: Brain-derived and in vitro-seeded alpha-synuclein fibrils exhibit distinct biophysical profiles
Source: eLife journal article supplement (doi:10.7554/elife.92775), 2024-03-21
Supplement: supp1 [file elife-92775-supp1-v1.pdf]

Table 1:

| Case  | Region | Age of death | Sex | Clinical Diagnosis | Disease duration (yrs) | Path Diagnosis | PMI (hr) | Braak aSyn stage | Braak tau stage | CERAD |
|-------|--------|--------------|-----|--------------------|------------------------|----------------|----------|------------------|-----------------|-------|
| PD 1  | ECtx   | 86           | M   | PD                 | 8                      | PD             | 20       | 6                | 2               | 0     |
| PD 2  | ECtx   | 78           | M   | PD                 | 6                      | PD             | 31       | 6                | 2               | 1     |
| PD 3  | ECtx   | 90           | M   | PD                 | 8                      | PD             | 14       | 6                | 2               | 1     |
| PDD 1 | ECtx   | 75           | M   | PDD                | 25                     | PDD            | 20       | 6                | 2               | 2     |
| PDD 2 | ECtx   | 81           | M   | PDD                | 10                     | PDD            | 11       | 6                | 2               | 0     |
| PDD 3 | ECtx   | 83           | M   | PDD                | 16                     | PDD            |          | 6                | 2               | 1     |
| DLB 1 | ECtx   | 76           | M   | Possible AD        | 7                      | DLB +AD        | 52       | 6                | 3               | 2     |
| DLB 2 | ECtx   | 92           | F   | Possible AD        | 14                     | DLB +AD        | 96       | 6                | 3               | 2     |
| DLB 3 | ECtx   | 86           | M   | AD + CVD           | 6                      | DLB +AD        | 19       | 6                | 3               | 2     |
| MSA 1 | BG     | 65           | M   | PD                 | 5                      | MSA            | 22       | 0                | 0               | 0     |
| MSA 2 | BG     | 59           | M   | MSA                | 2                      | MSA            | 24       | 0                | 0               | 0     |
| MSA 3 | BG     | 67           | F   | MSA                | 2                      | MSA            | 24       | 0                | 1               | 0     |
| HC 1  | ECtx   | 51           | M   | NA                 | NA                     | NA             | 10       | 0                | 0               | 0     |
| HC 2  | ECtx   | 69           | M   | NA                 | NA                     | NA             | 48       | 0                | 1               | 0     |
| HC 3  | BG     | 71           | F   | NA                 | NA                     | NA             | 50       | 0                | 1               | 0     |
