# Supplementary figures and images for: Brain-derived and in vitro-seeded alpha-synuclein fibrils exhibit distinct biophysical profiles
Source: eLife journal article supplement (doi:10.7554/elife.92775), 2024-03-21

Figure 6 - C slot blots

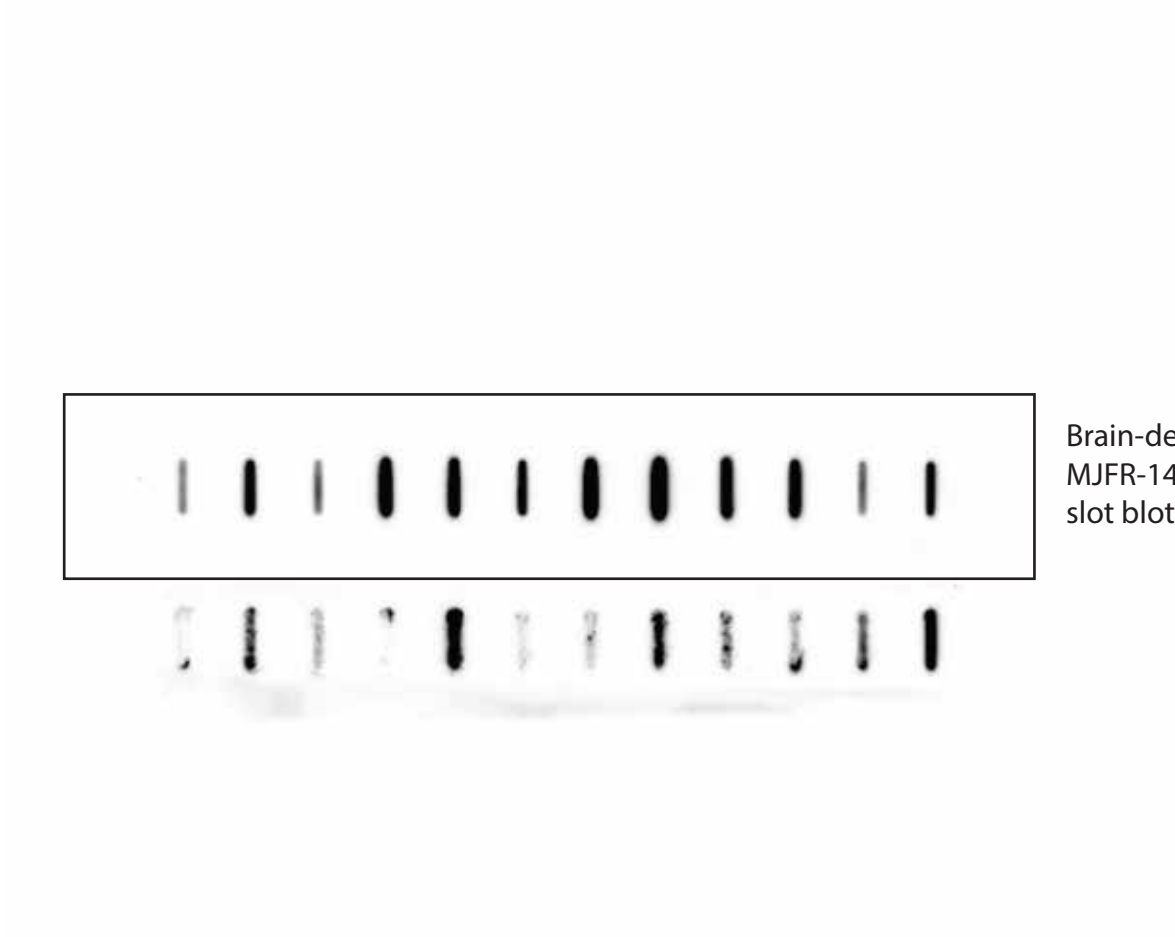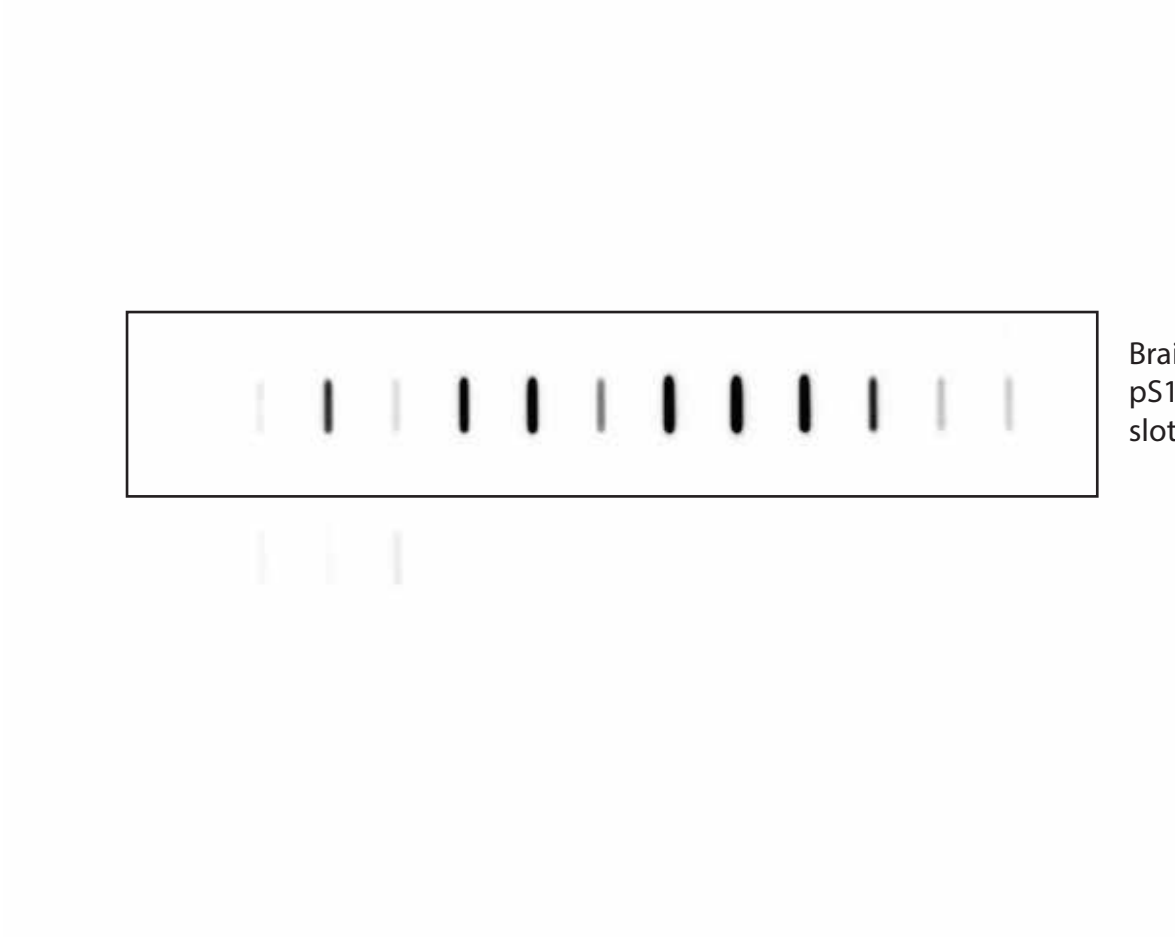

Figure 6 - D slot blots

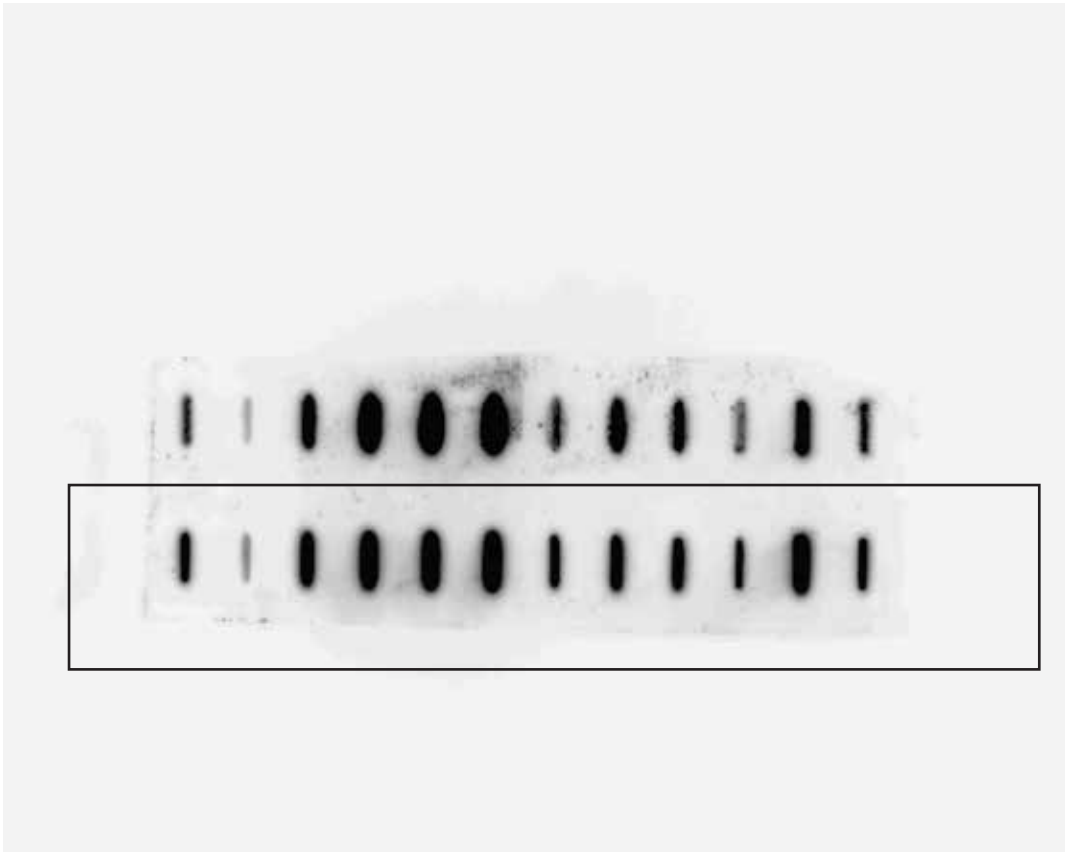

SAA fibrils  
MJFR-14  
slot blot

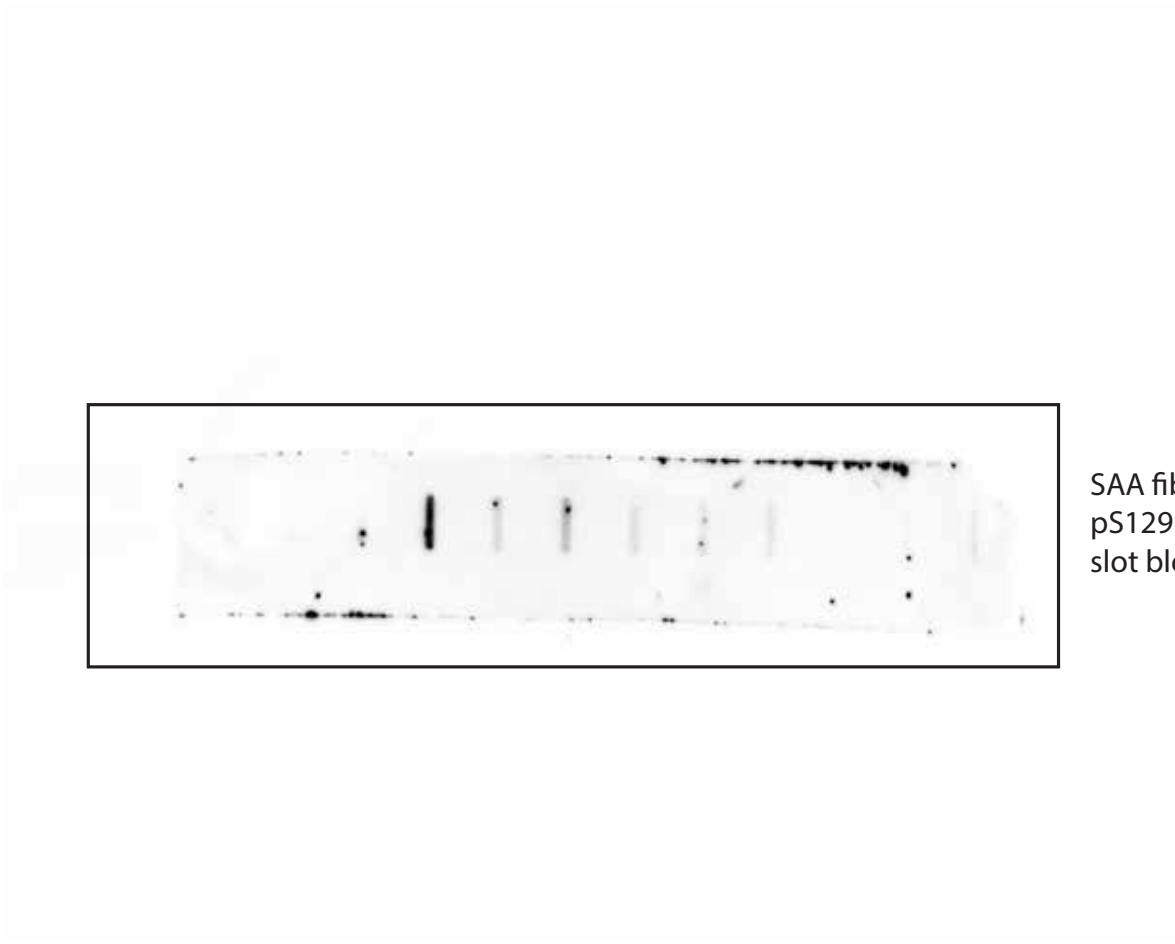

SAA fibrils  
pS129  
slot blot

Supplement: fig6-data2 [file elife-92775-fig6-data2-v1.zip]

Figure 6 - figure supplement 1 A-D slot blots

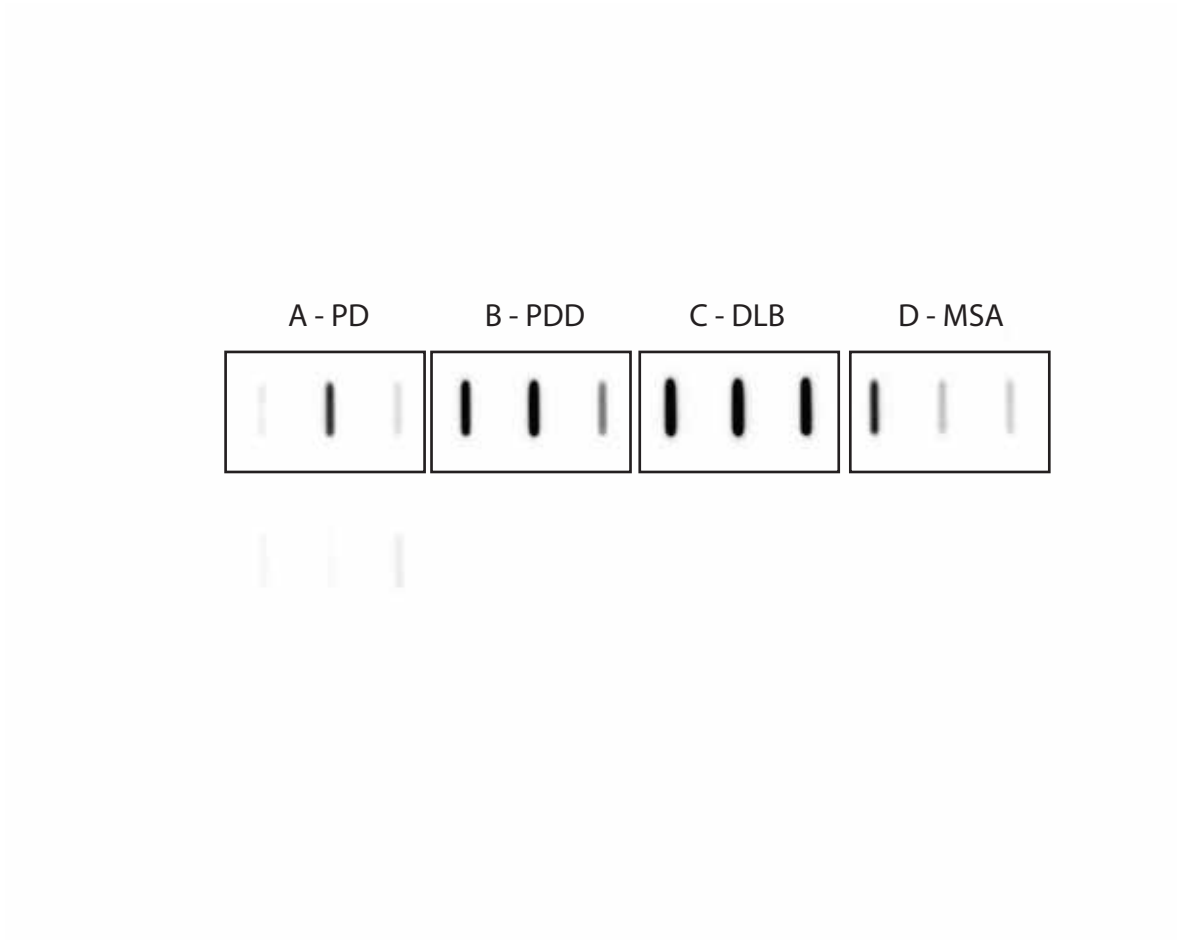

Supplement: fig6-figsupp1-data2 [file elife-92775-fig6-figsupp1-data2-v1.zip]
